# Supplementary material for: Small CD4 mimetics sensitize HIV-1-infected macrophages to antibody-dependent cellular cytotoxicity
Source: PubMed Central journal article supplement — Cell Rep. Author manuscript; Available in PMC 2023 Feb 21. (PMC9941794; doi:10.1016/j.celrep.2022.111983), 2023-01-10
Supplement: NIHMS1870528-supplement-1.pdf [file NIHMS1870528-supplement-1.pdf]

**Cell Reports, Volume 42**

**Supplemental information**

**Small CD4 mimetics sensitize**

**HIV-1-infected macrophages**

**to antibody-dependent cellular cytotoxicity**

**Annemarie Laumaea, Lorie Marchitto, Shilei Ding, Guillaume Beaudoin-Bussières, Jérémie Prévost, Romain Gasser, Debashree Chatterjee, Gabrielle Gendron-Lepage, Halima Medjahed, Hung-Ching Chen, Amos B. Smith III, Haitao Ding, John C. Kappes, Beatrice H. Hahn, Frank Kirchhoff, Jonathan Richard, Ralf Duerr, and Andrés Finzi**

**Table S1:**Relative CD4 and BST2 levels on surface of CD4<sup>+</sup>T cells and Macrophages (Related to Figure 1)

|                  | AD8     |       | YU2     |       |         |       | JRFL    |       |         |       | CH77    |       |         |       |         |       |
|------------------|---------|-------|---------|-------|---------|-------|---------|-------|---------|-------|---------|-------|---------|-------|---------|-------|
|                  | CD4     |       | BST2    |       | CD4     |       | BST2    |       | CD4     |       | BST2    |       | CD4     |       | BST2    |       |
|                  | T cells | Mφ    |
| <b>Mock</b>      | 100.0   | 100.0 | 100.0   | 100.0 | 100     | 100.0 | 100.0   | 100.0 | 100.0   | 100.0 | 100.0   | 100.0 | 100.0   | 100.0 | 100.0   | 100.0 |
| <b>WT</b>        | 0.7     | 18.1  | 9.3     | 42.5  | 3.4     | 16.7  | 4.8     | 62.5  | 2.4     | 18.4  | 28.2    | 42.8  | 0.8     | 14.7  | 9.9     | 53.9  |
| <b>N-</b>        | 43.7    | 21.3  | 11.1    | 50.4  | 29.1    | 19.6  | 6.9     | 80.9  | 41.8    | 21.2  | 20.5    | 41.7  | 15.1    | 17.6  | 15.9    | 69.5  |
| <b>U-</b>        | 2.0     | 19.8  | 62.3    | 85.5  | 17.1    | 17.5  | 78.9    | 111.4 | 5.0     | 28.0  | 117.1   | 98.3  | 4.2     | 23.2  | 106.4   | 88.9  |
| <b>N-U-</b>      | 37.6    | 30.6  | 104.3   | 106.4 | 58.5    | 36.9  | 110.5   | 133.7 | 69.2    | 35.6  | 130.5   | 112.6 | 31.3    | 32.2  | 137.1   | 85.4  |
| <b>D368R</b>     | 1.1     | 18.8  | 10.7    | 42.2  | 5.2     | 19.3  | 4.4     | 71.2  | 1.7     | 31.4  | 14.2    | 36.0  | 1.2     | 14.0  | 8.6     | 61.9  |
| <b>N-U-D368R</b> | 72.3    | 103.2 | 112.1   | 107.2 | 97.2    | 197.1 | 107.7   | 141.0 | 112.5   | 130.0 | 125.9   | 106.1 | 118.7   | 70.2  | 135.7   | 114.3 |

WT : Wild type

N-: Nef Defective

U-: Vpu defective

D368R: CD4 binding site mutant

Mφ : Macrophage

**Table S2:**Summary of Anti-HIV antibodies/ligands utilized for assessment

| Antibody           | Env subunit | Epitope/Region                         | Ab/Drug class | Conformational State |
|--------------------|-------------|----------------------------------------|---------------|----------------------|
| 2G12               | gp120       | Outer domain/oligomannose patch        | bNAbs         | independent          |
| PG9                | gp120       | V1V2-apex                              | bNAbs         | 1                    |
| PGT121             | gp120       | V3-glycan                              | bNAbs         | 1                    |
| 10.1074            | gp120       | V3-glycan                              | bNAbs         | 1                    |
| VRC03              | gp120       | CD4bs                                  | bNAbs         | 1                    |
| 3BNC.117           | gp120       | CD4bs                                  | bNAbs         | 1                    |
| PGT151             | gp41        | fusion peptide                         | bNAbs         | 1                    |
| 10E8               | gp41        | MPER                                   | bNAbs         | 2/3                  |
| F240               | gp41        | cluster I region of gp41               | nnAb          | 2/3                  |
| 19b                | gp120       | V3-tip                                 | nnAb          | 2/3                  |
| 17b                | gp120       | CoRbs                                  | nnAb          | 2                    |
| A32                | gp120       | cluster A region of gp120 inner domain | nnAb          | 2A                   |
| <b>BNM III 170</b> | gp120       | CD4bs                                  | CD4 mimetic   | 2                    |

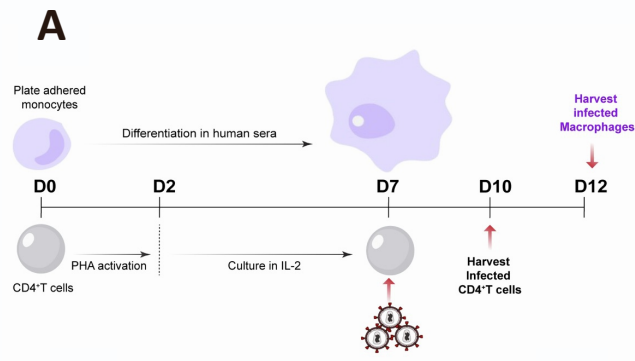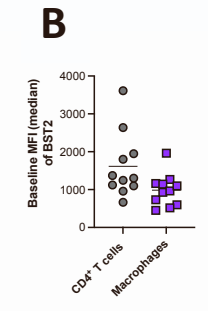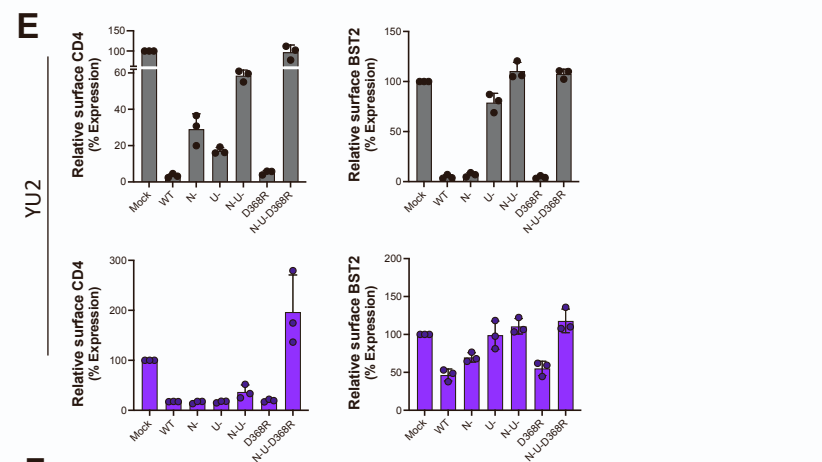

**C** CD4<sup>+</sup>T cells

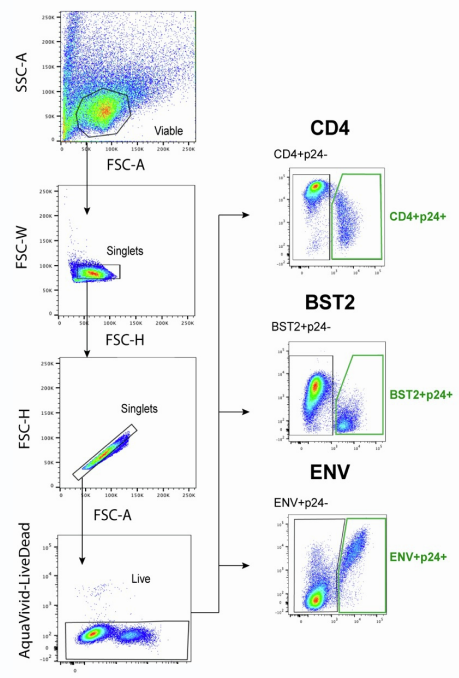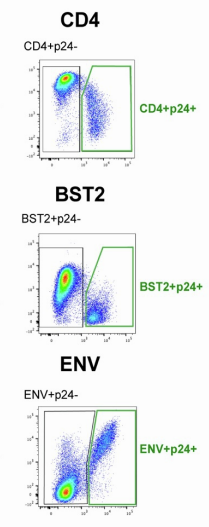

**D** Macrophages

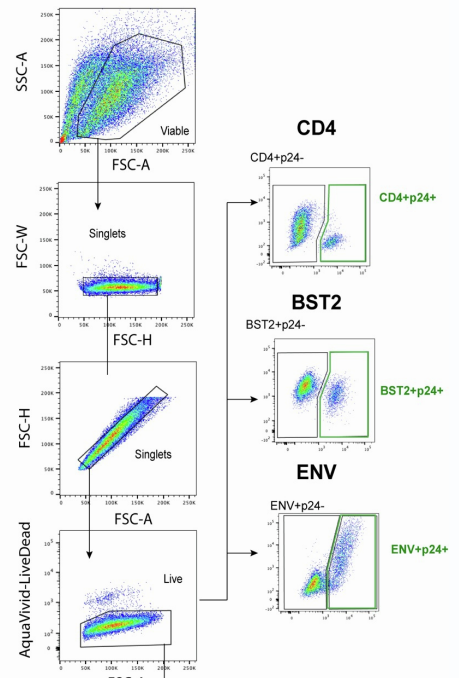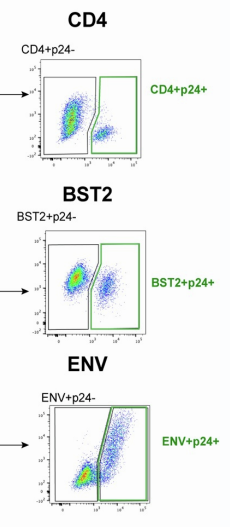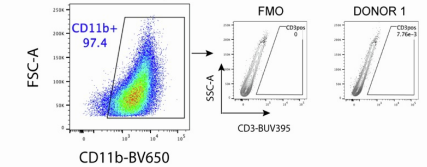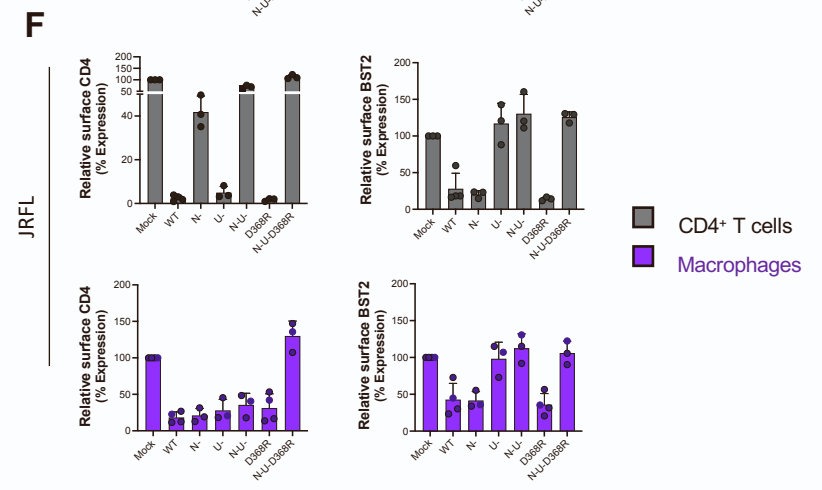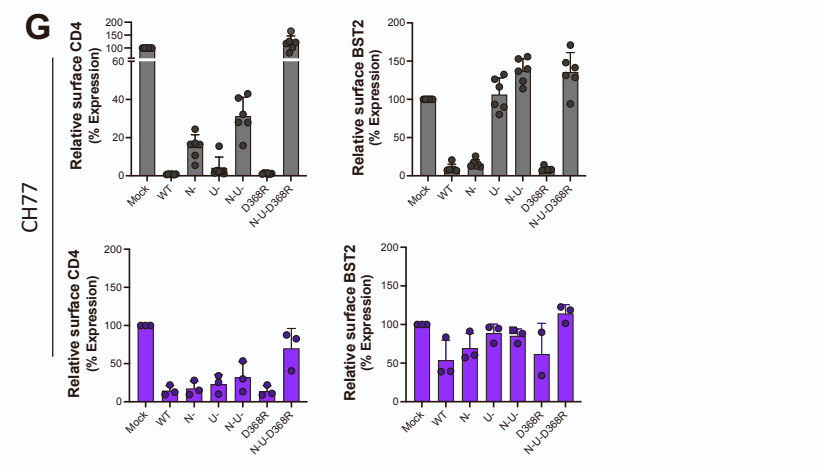

**Figure S1. Effect of Nef, Vpu and Env on the surface expression of CD4 and BST2 in autologous CD4<sup>+</sup> T cells and macrophages infected with different HIV-1 strains (Related to Figure 1).**

(A) Schematic of experimental timeline. Details are described in STAR METHODS. (B) Baseline Mean Fluorescence Intensity (MFI) of BST2 on uninfected CD4<sup>+</sup> T cells and macrophages from 12 different experiments. Gating strategy for measurement of expression of Env, BST and CD4 on (C) CD4<sup>+</sup> T cells and (D) macrophages; (E-G) Relative surface levels of CD4 and BST2 on autologous CD4<sup>+</sup>T cells and macrophages infected with panel of viruses [wt, nef-defective (N-), Vpu-defective (U-), or both Nef and Vpu (N-U-), CD4BS mutant (D368R) and N-U-D368R mutant] from (E) HIV-1<sub>YU2</sub> (F) HIV-1<sub>JR-FL</sub> and (G) HIV-1<sub>CH77</sub>. Bar graphs represent percent fold change in CD4 expression relative to Mock (p24<sup>+</sup>/uninfected cells) or percent fold change in BST2 expression of p24<sup>+</sup> relative to p24<sup>-</sup> cells (p24<sup>+</sup>/p24<sup>-</sup>). Shown are data from at least 3 donors.

**A** 2G12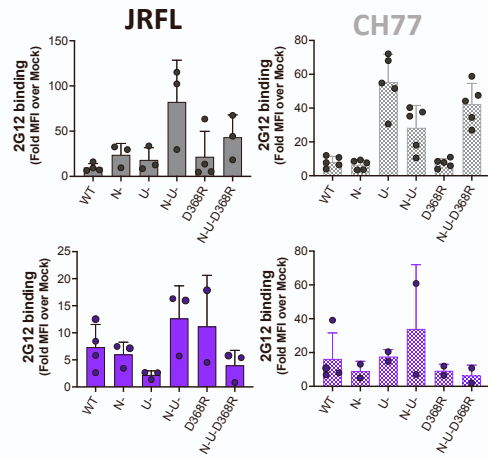**B** PG9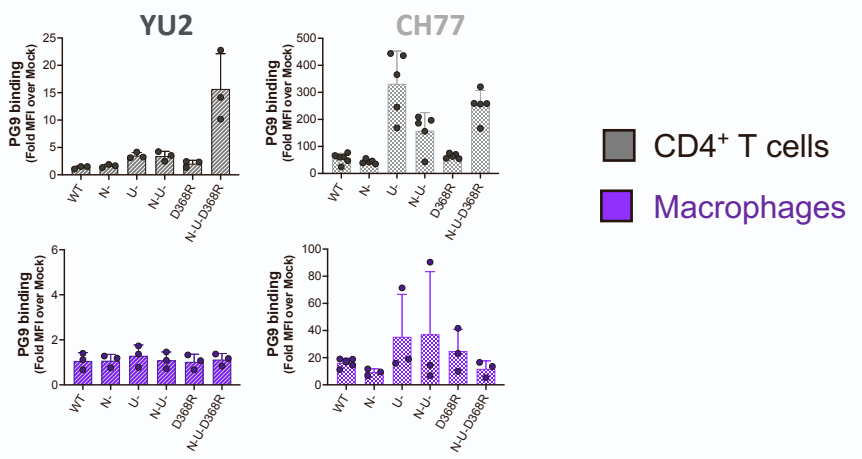**C** PGT121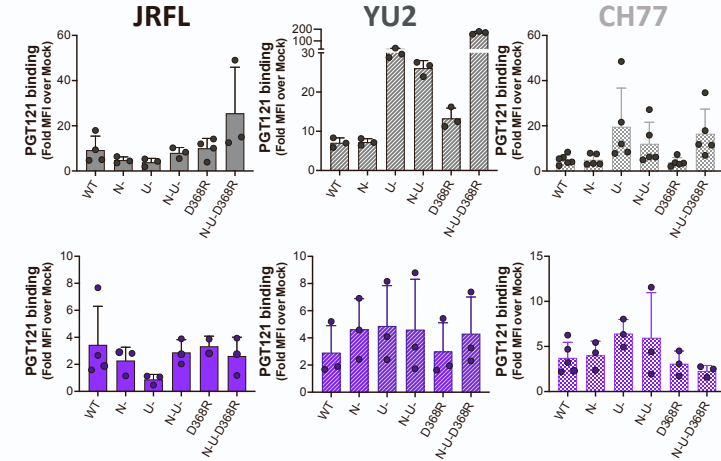**D** 10.1074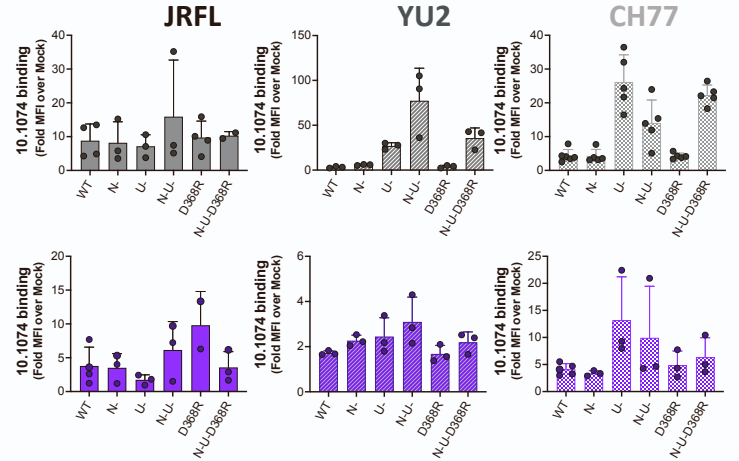**E** 3BNC.117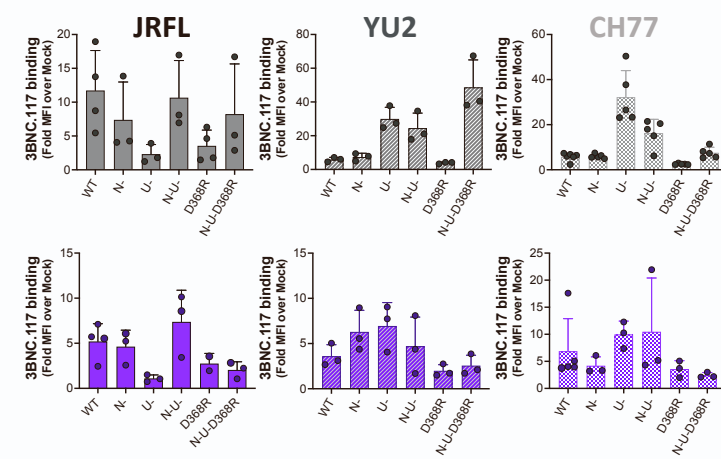**F** VRC03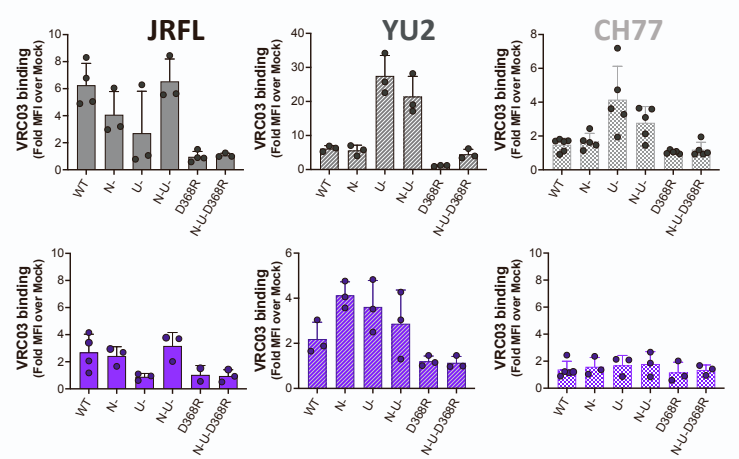**G** PGT151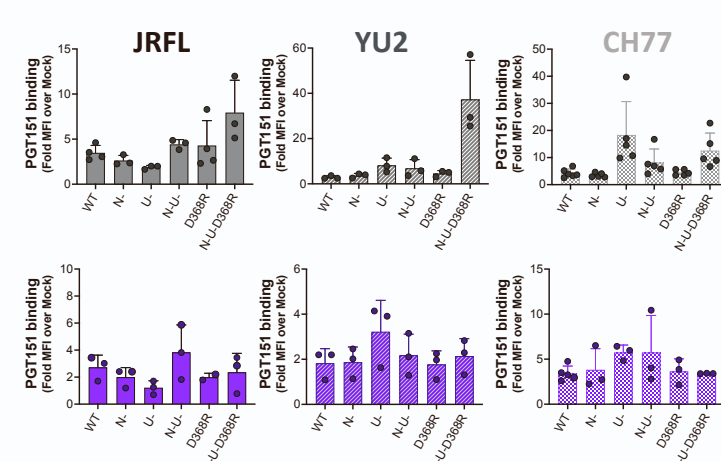**H** 10E8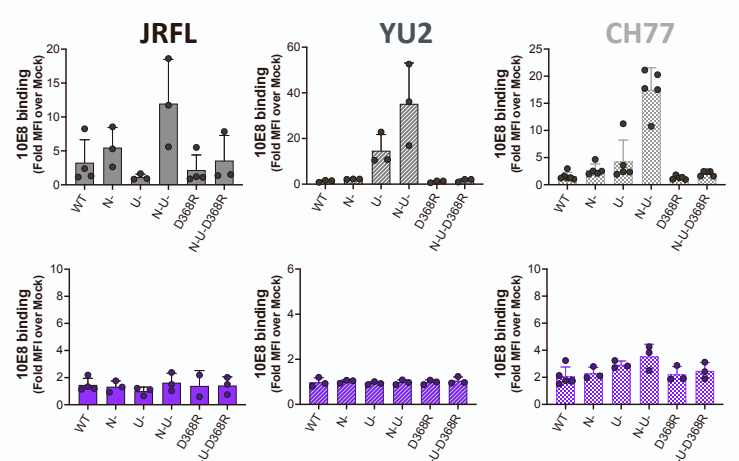

**Figure S2. HIV-1 Env detection by a panel of mAbs at the surface of autologous CD4<sup>+</sup> T cells and macrophages infected with different HIV-1 strains. (Related to Figure 2).**

Autologous CD4<sup>+</sup>T cells and macrophages were infected with panel of viruses [wt, nef-defective (N-), Vpu-defective (U-), or both Nef and Vpu (N-U-) and CD4BS mutant (D368R) and N-U-D368R mutant] from HIV-1<sub>JR-FL</sub>, HIV-1<sub>CH77</sub> and HIV-1<sub>YU2</sub>. 48h later (CD4<sup>+</sup> T cells) or 5 days post-infection (Macrophages). Cells were then stained with (A) 2G12 a conformation independent antibody; (B) the V1V2-apex antibody PG9; V3glycan antibodies (C) PGT121 and (D) 10.1074; CD4BS antibodies (E) 3BNC117 and (F) VRC03; (G)PGT151 which targets the gp120-gp41 interface; and the (H) anti-MPER antibody 10E8. Bar graphs show Fold antibody binding over Mock cells. Shown are data from a minimum of 3 donors.

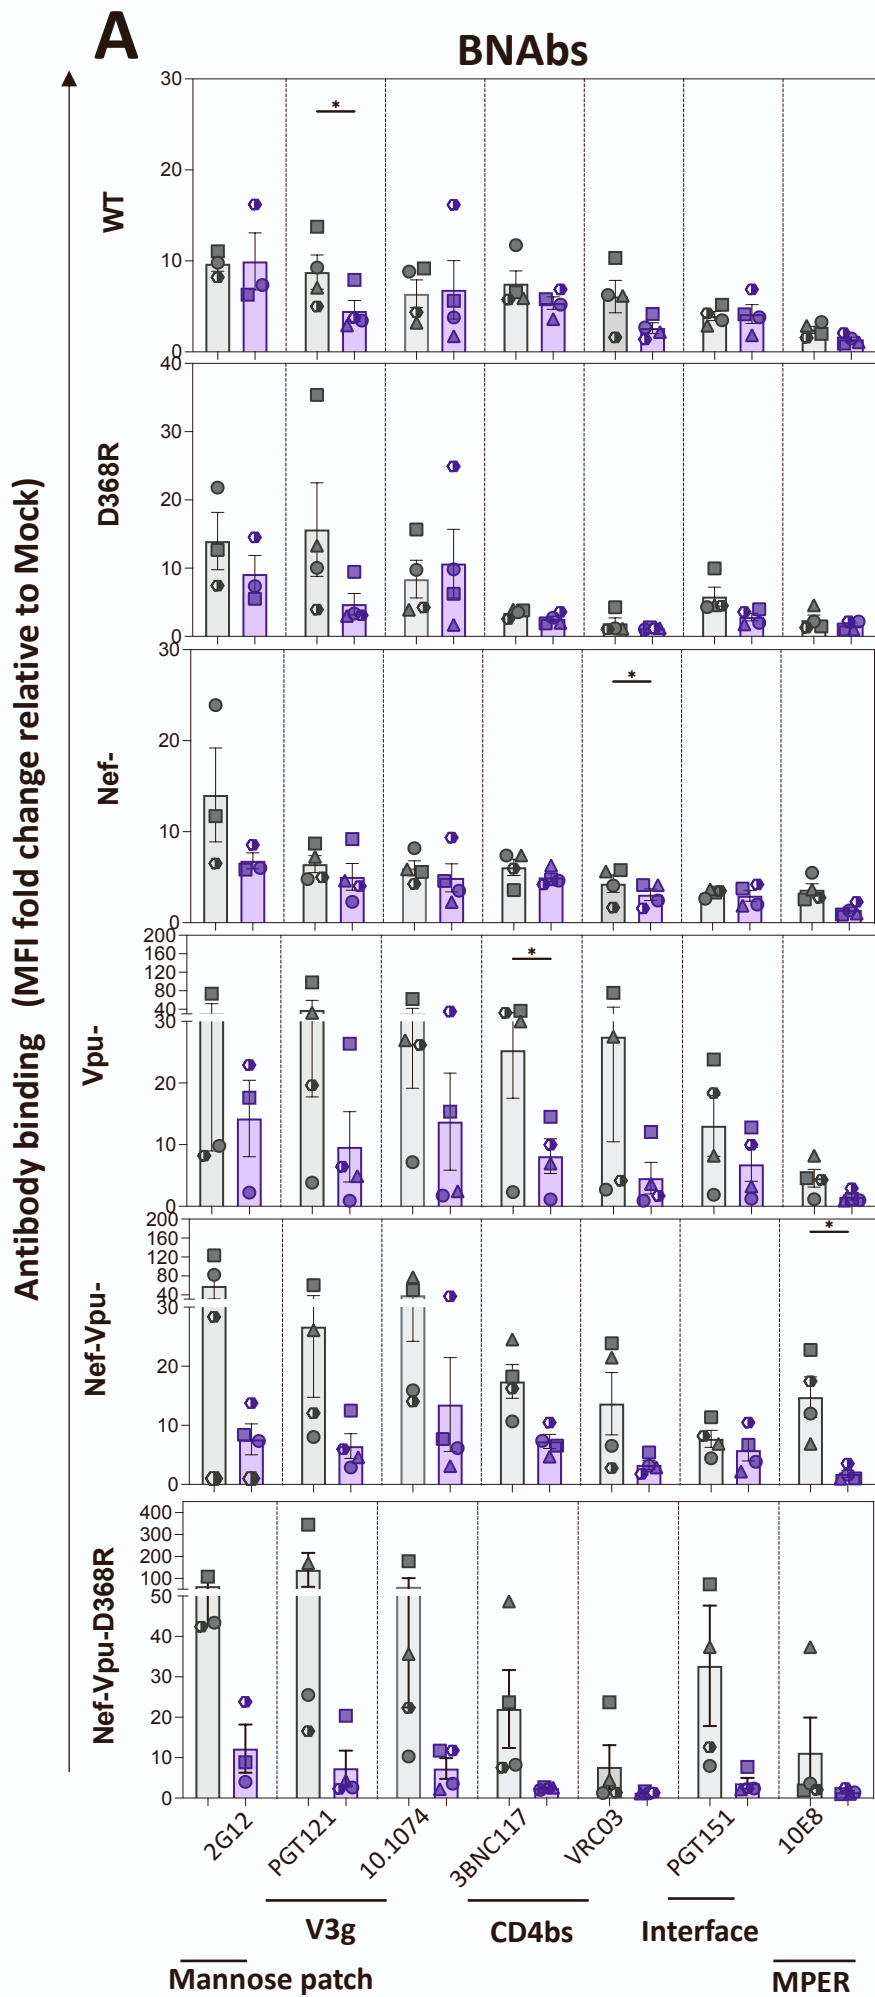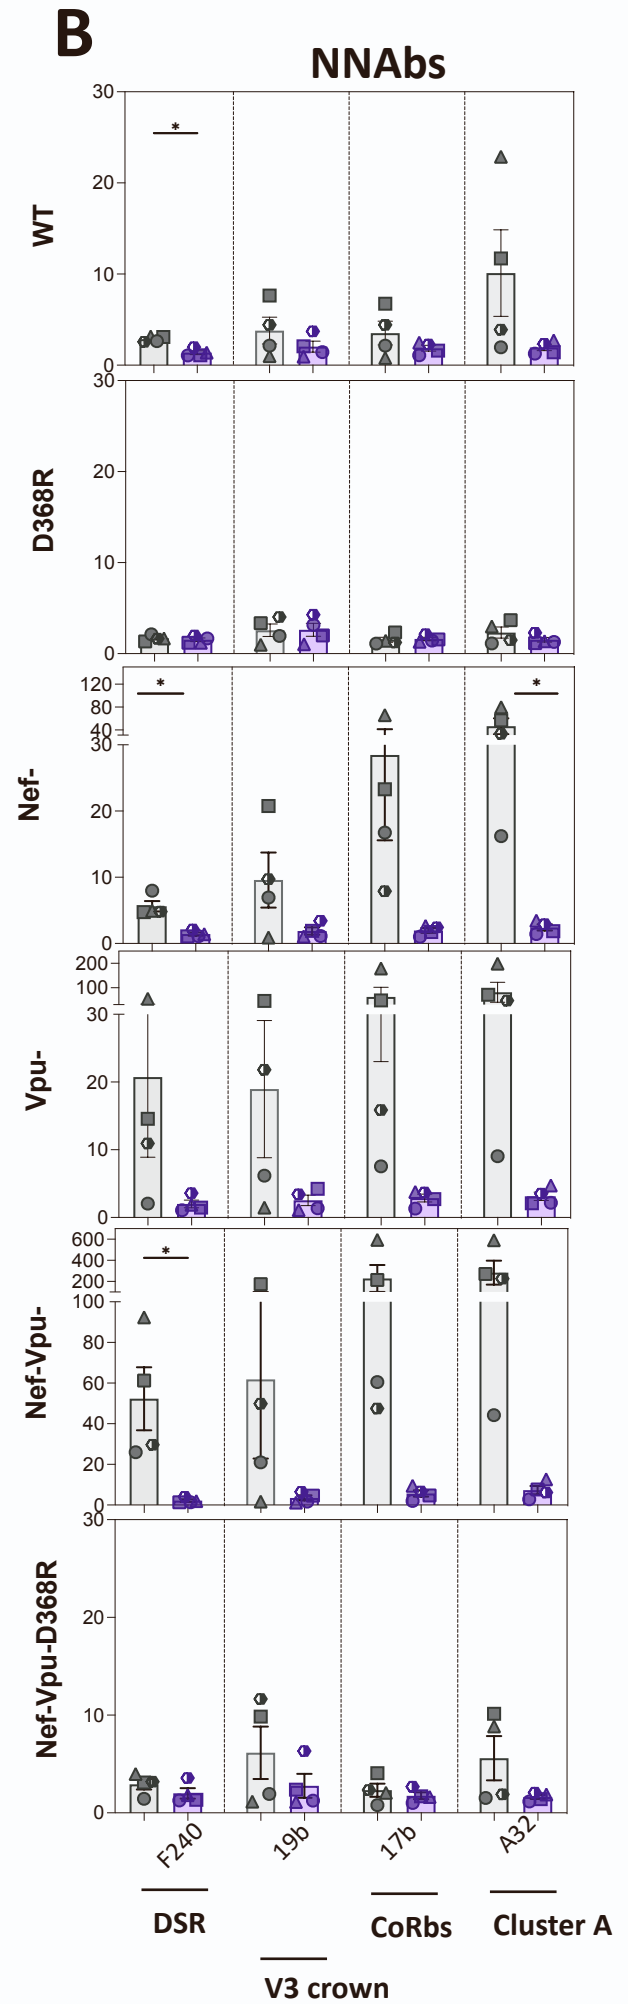

**Figure S3. HIV Env conformational landscape on the surface of autologous CD4<sup>+</sup> T cells and macrophages infected with different HIV strains (Related to Figures 2 and 3)**

Summary of Env recognition on Autologous (CD4<sup>+</sup>T cells and macrophages infected for 48h (CD4<sup>+</sup> T cells) or 5 days (Macrophages) with panel of viruses [wt, nef-defective (N-), Vpu-defective (U-), or both Nef and Vpu (N-U-) and CD4BS mutant (D368R) and N-U-D368R mutant] of different IMCs (AD8, YU2, JRFL, CH77). (A) Recognition by bNAbs. (B) Recognition by nnAbs. Statistical significance was tested using paired *t* test (\**p*<0.05; \*\**p*<0.001; \*\*\**p*<0.0001); only comparison less than or equal to 0.05 are shown. Shown are data from at least 3 donors.



JRFL

A

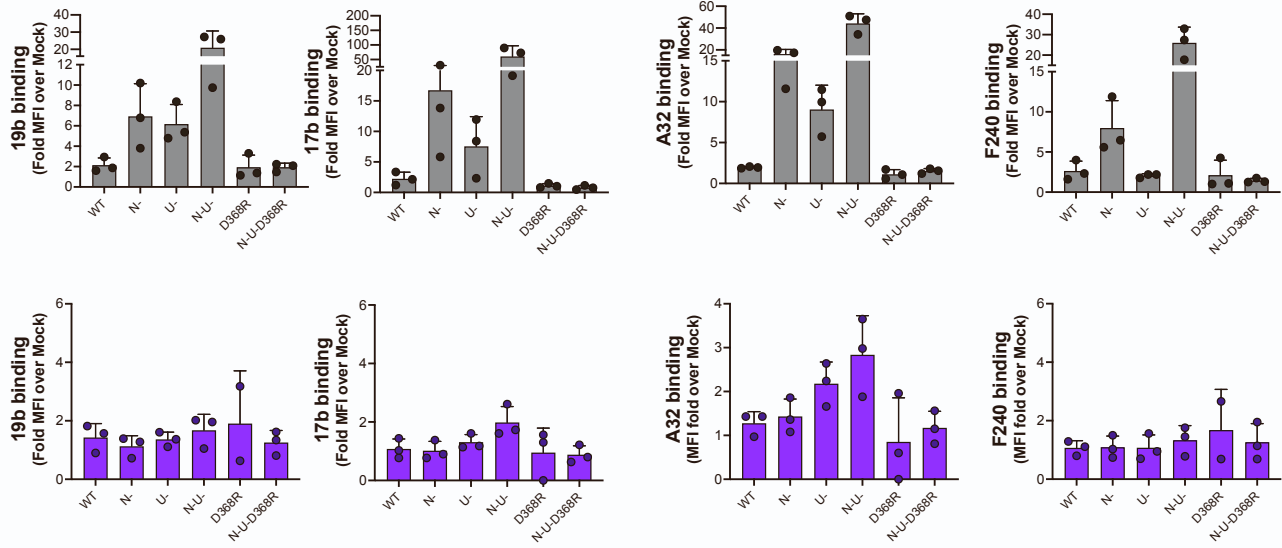

YU2

B

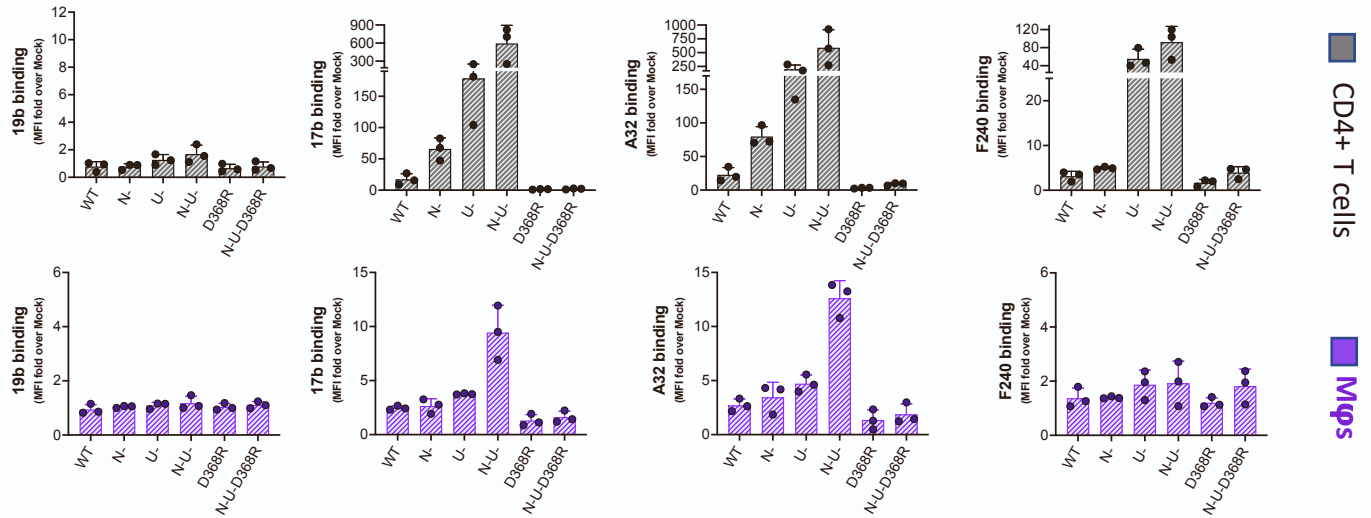

CH77

C

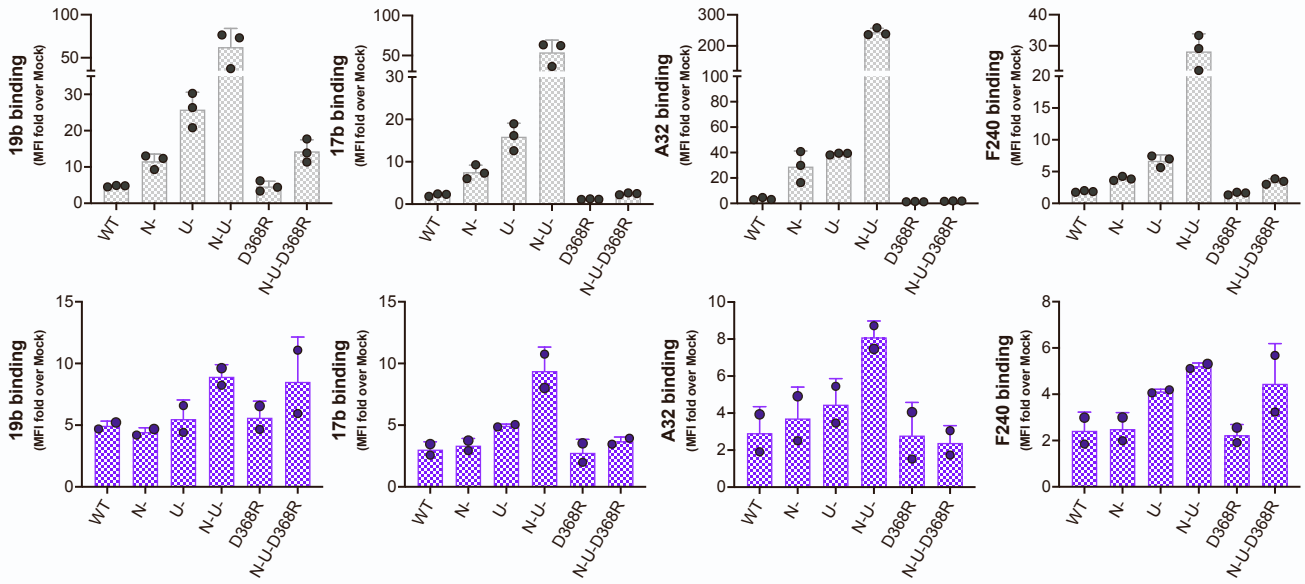

D

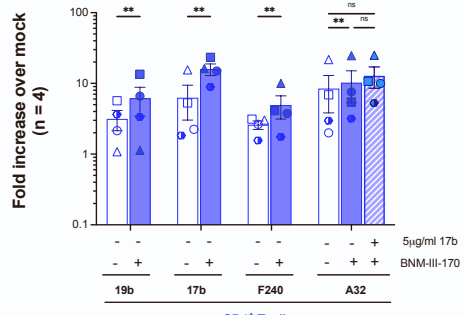

E

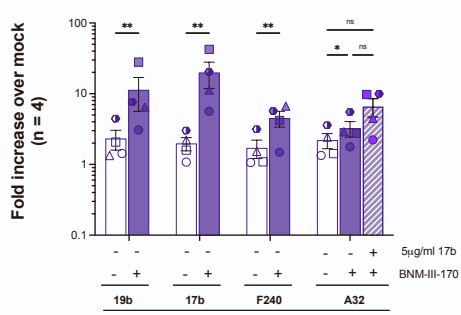

**Figure S4. Impact of HIV-1 accessory proteins Nef, Vpu and small molecule CD4mc on Env conformation (Related to Figure 3).**

Autologous CD4<sup>+</sup>T cells and macrophages were infected with panel of viruses [wt, nef-defective (N-), Vpu-defective (U-), or both Nef and Vpu (N-U-) and CD4BS mutant (D368R) and N-U-D368R mutant] from (A) HIV-1<sub>JR-FL</sub>, (B) HIV-1<sub>YU2</sub> and (C) HIV-1<sub>CH77</sub>. 48h later (CD4<sup>+</sup> T cells) or 5 days post-infection (Macrophages), cells were stained with non-neutralizing antibodies 19b (V3 crown), 17b (Co-receptor binding site), A32 (Anti-cluster A) and F240 (gp41-Disulfide loop region). Fold increase in nnAb binding in the presence of the CD4mc for (D) CD4<sup>+</sup>T cells and (E) macrophages. Bar graphs show Fold antibody binding over Mock cells. Statistical significance for panels D and E was tested using Mixed Effect analysis (\*p<0.05; \*\*p<0.001; \*\*\*p<0.0001; ns, non-significant). Data shown are from minimum of 2 donors.

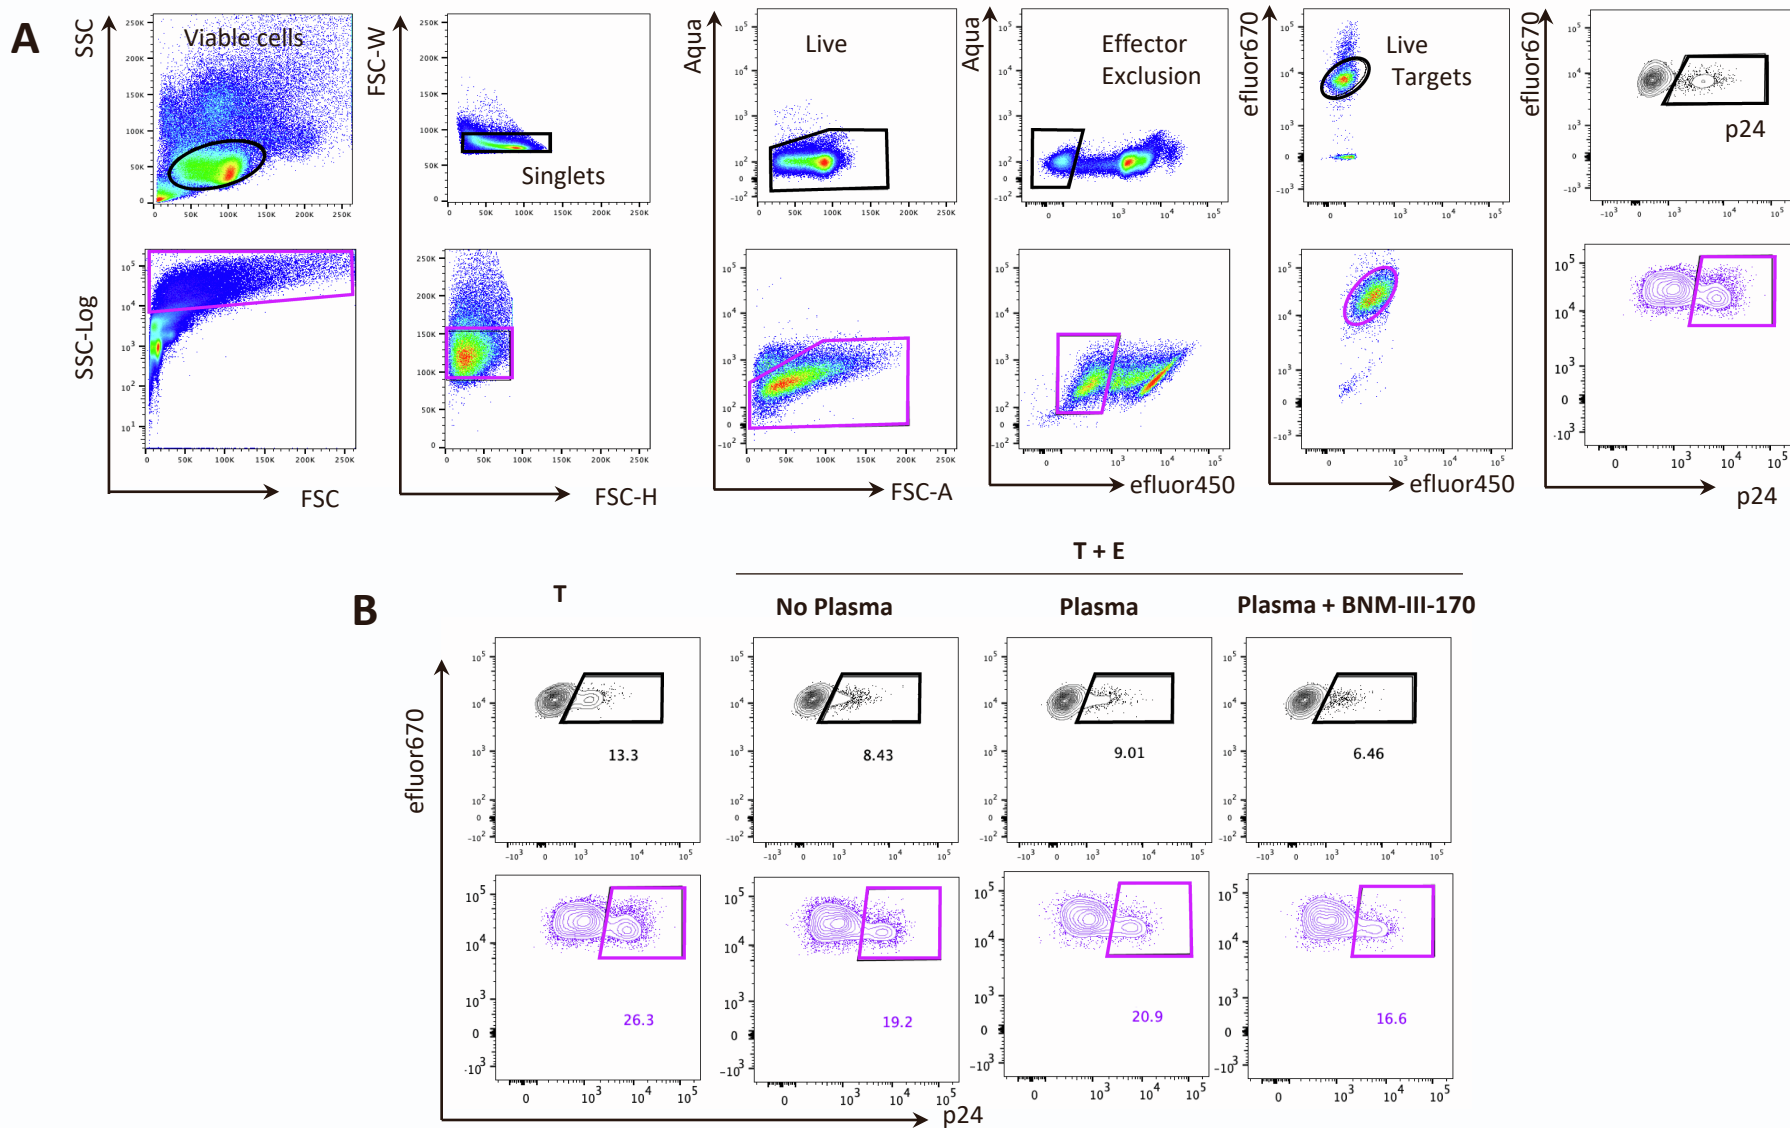

**Figure S5. Gating strategy for CD4<sup>+</sup>T cells and Macrophages ADCC Assays (Related to Figure 4).**

Gating strategy for ADCC assays performed for CD4<sup>+</sup>T cells (*Top panel*) and Macrophages (*Bottom panel*) infected with HIV-1<sub>AD8</sub> wildtype (WT) or virus defective to Nef and Vpu (N-U-) and incubated with autologous PBMCs for 5h. Macrophages and CD4<sup>+</sup>T cells were gated for viable cells. Side Scatter Axis for macrophages were transformed to log axis to visualize both the large macrophage targets and the small PBMC effectors. Subsequent doublet exclusion was performed, followed by live dead exclusion and effector exclusion. Targets were then selected and subsequent gating was done on the p24<sup>+</sup> gate for Targets alone (T), and Targets with Effectors (T+E) in presence or absence of HIV+ plasma and/or CD4mc BNM-III-170

**A**

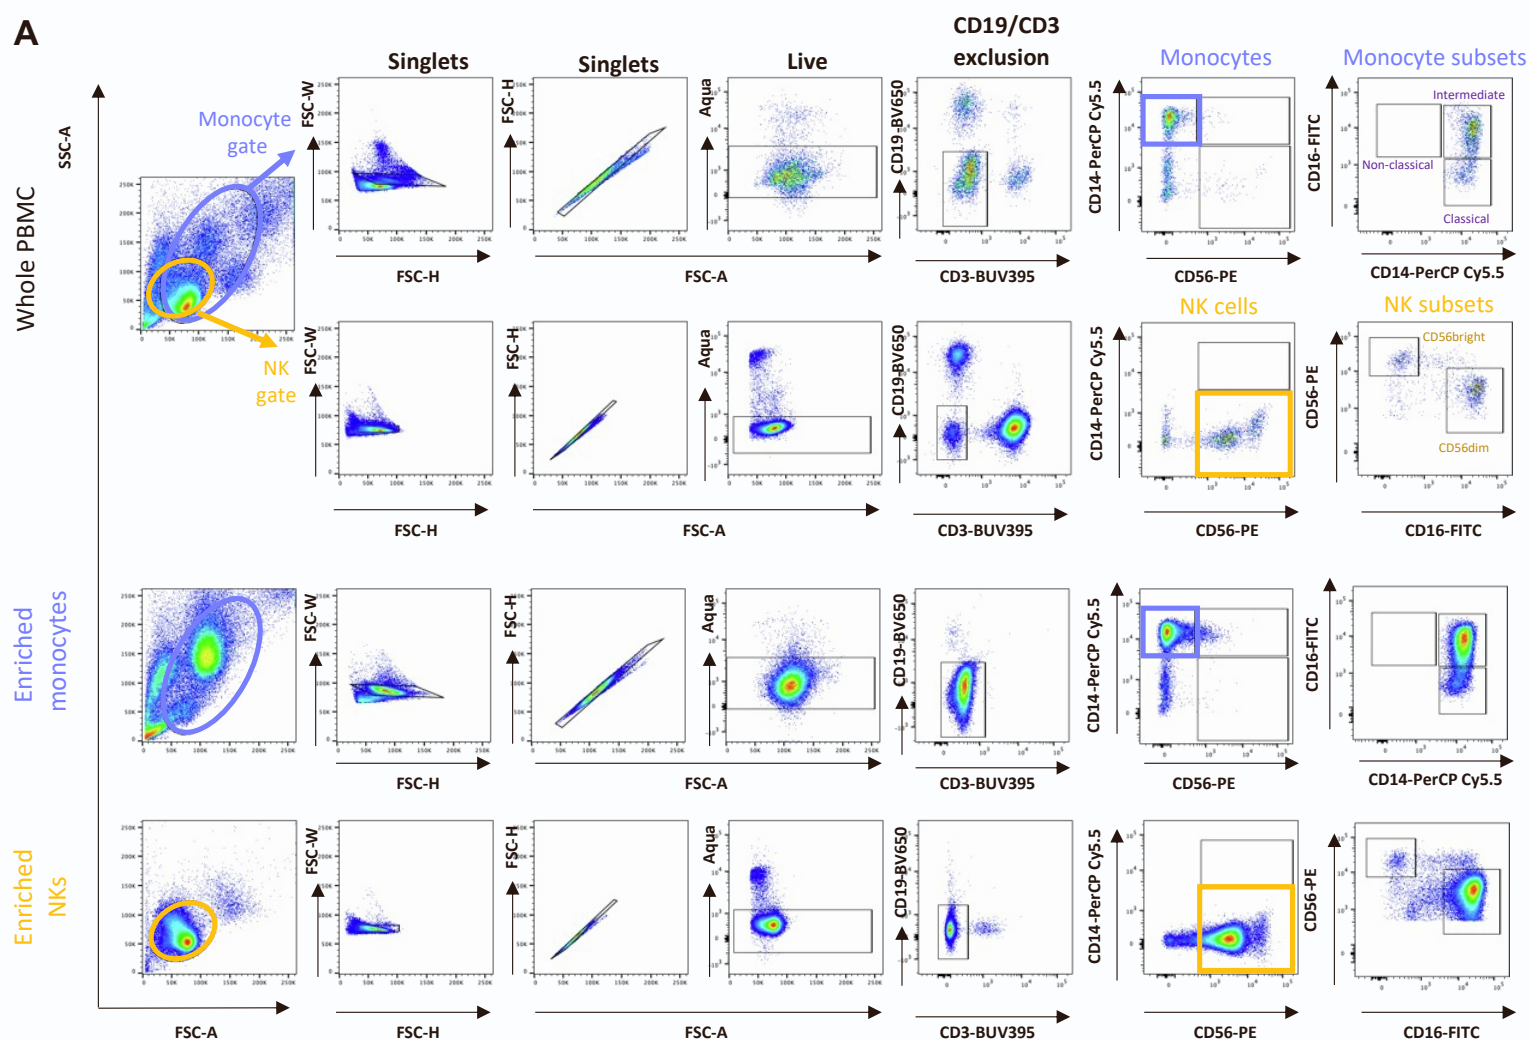

**B**

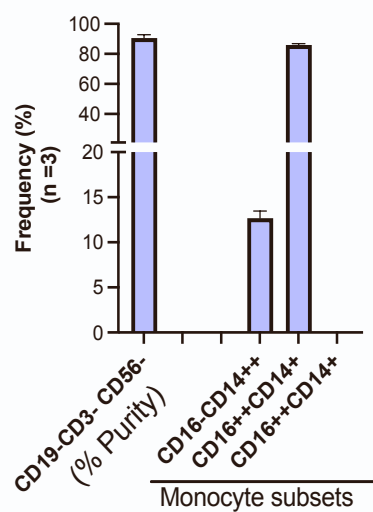

**C**

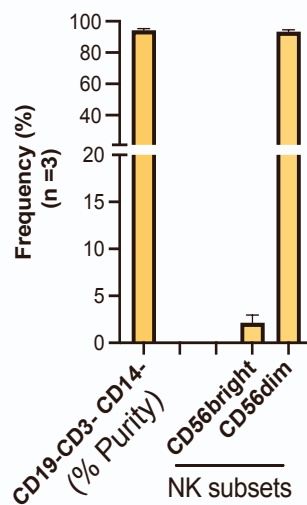

**Figure S6. Effector cell gating strategy (Related to Figure 4).**

**(A)** Whole PBMC effectors utilized for ADCC assays (*top panel*) were stained for the NK cell marker CD56 and monocyte marker CD14 to determine presence of these populations. Cells were first gated on morphology followed by doublet exclusion, dead cell exclusion and exclusion of CD19+ and CD3+ populations. Gating on CD14 and CD56 distinguished the monocyte and NK population respectively. Presence of CD16 on both cell populations enabled subset determination. Similarly enriched monocytes (*middle panel*) were stained with monocyte markers CD14 and enriched NK cells with CD56 (*bottom panel*) to confirm purity of cells in the enriched cell fractions utilized for ADCC assays. Similar gating strategy as whole PBMCs was applied for purity confirmation and subset determination. **(B)** Purity of monocytes and proportion of classical (CD16-CD14++), intermediate (CD14+CD16++) and non-classical (CD16+CD14+) subsets present during ADCC **(C)** Purity of NK cells and proportion of CD56bright and CD56dim present during ADCC.



**Figure S7. ADCC of HIV-1 infected CD4<sup>+</sup>T cells and Macrophages by autologous Effectors: PBMCs, Monocytes or NK cell effectors (Related to Figure 4).**

Autologous CD4<sup>+</sup>T cells and macrophages were infected with HIV-1<sub>AD8</sub> and subsequently incubated with autologous Effectors, PBMC (**B,E,H**), NK cells (**C,F,I**) or monocytes (**D,G,J**) for 5h in the presence of 5 different HIV+ plasma (represented by the different symbols) with or without the CD4mc BNMIII170 (**A-G**); or select bNAbs (2G12, PGT121, 10.1074, 3BNC.117) (**H,I,J**). Percent (%) ADCC of CD4<sup>+</sup> T cells (**B, C, D**) and macrophages (E,F,G) were determined as outlined in STAR METHODS. Statistical significance was tested using paired *t*-test (\**p*<0.05; \*\**p*<0.001; \*\*\**p*<0.0001; ns, non-significant). Data show ADCC for 4 donors.
